# Supplementary material for: Photocurrent Production from Cherries in a Bio-Electrochemical Cell
Source: MDPI journal article supplement (doi:10.3390/electrochem4010005), 2023-02-09
Supplement: s1 [file s1]

## Supplementary information

### Photocurrent production from cherries in a bio-electrochemical cell.

Table. S1. Comparison of maximal current production from BECs based on intact organisms.

| Organism      | Species                         | Working electrode | Potential vs Ag/AgCl | Max current                      | Ref       |
|---------------|---------------------------------|-------------------|----------------------|----------------------------------|-----------|
| Bacteria      | <i>Escherichia coli</i>         | Graphite          | 0.9 V                | 0.12 $\mu\text{A} / \text{cm}^2$ | [9]       |
| Cyanobacteria | <i>Trichodesmium Erythraeum</i> | Graphite          | 0.5 V                | 3.5 $\mu\text{A} / \text{cm}^2$  | [22]      |
| Cyanobacteria | <i>Synechocystis</i> sp.6083    | Graphite          | 0.5 V                | 0.5 $\mu\text{A} / \text{cm}^2$  | [23],[24] |
| Microalgae    | <i>Dunaliella Salina</i>        | Graphite          | 0.5 V                | 2.5 $\mu\text{A} / \text{cm}^2$  | [26]      |
| Seaweeds      | <i>Ulva</i>                     | Stainless steel   | 0.5 V                | 40 $\text{mA} / \text{cm}^2$     | [31]      |
| Plant leaves  | Spinach                         | Stainless steel   | 0.5 V                | 7 $\text{mA} / \text{cm}^2$      | [34]      |
| Succulents    | <i>Corpuscularia lehmannii</i>  | Iron              | 0 V                  | 20 $\mu\text{A} / \text{cm}^2$   | [36]      |
| Sea anemons   | <i>Nematostella Vectensis</i>   | Graphite          | 0.5 V                | 0.9 $\mu\text{A} / \text{cm}^2$  | [41]      |
| Fruits        | Cherry                          | Graphite          | 0.9 V                | 2 $\mu\text{A} / \text{cm}^2$    | This work |

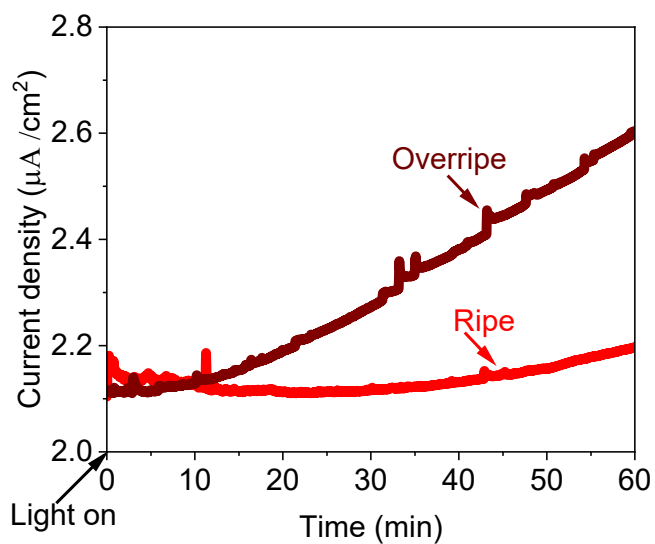

Figure S1. Continuous photocurrent production from ripe and overripe cherries. Photocurrent of ripe and overripe cherries were measured for 1 h under continuous illumination.
